# Supplementary material for: Human research subjects and current practice of research ethics committees in Czech academic environment: national regulation is urgently needed
Source: Research Square preprint supplement (doi:10.21203/rs.3.rs-3501056/v1), 2024-01-31
Supplement: Supplementary file 1 [file 5b22d51b63e3b54162b315c9.docx]

**Additional File 1:**

**Full version of the survey questionnaire. The original version, administered in Czech language, was subsequently translated into English for the purpose of this article.**

Thank you for your interest in the INSURE survey. Following this page is a questionnaire that may take approximately 15 minutes to complete. As it includes several questions asking for your views and asking you to respond in a few words or sentences, you will probably be more comfortable answering on a computer with a keyboard than on a mobile phone or tablet. The survey runs on the Qualtrics platform administered by Masaryk University. We do not collect any identifying data, and the automatic settings of the Qualtrics platform are disabled – we do not record geolocation data or the IP address of your device, the link you have logged in to is anonymous, and we will not require a "mandatory answer" to any question. The questions will only be about general operational aspects of discussing project ethics at your workplace, and they will not be targeted in any way to the specific projects under discussion. Only at the end of the study will we ask you to identify your workplace if you wish – the question can, however, be left blank.

**Q1 / The agenda of your ethics committee includes:**

1. Reviewing ethical aspects of research projects (protection of research participants)
2. Reviewing cases of possible breaches of academic or scientific integrity (scientific misconduct)
3. Consultancy activities for researchers and academics – please specify:
4. Something else – please specify:

**Q2 / Approximately how large is your ethics committee?**

1. Up to 5 members
2. 6 to 10 members
3. More than 10 members

**Q3 / Membership of your ethics committee:**

1. Is bound to a defined mandate, which is renewable
2. Is for a defined mandate, which is not renewable
3. Is not limited to a specific mandate

**Q4 / Your ethics committee includes members who (please check all that apply to at least one member of the committee):**

1. Hold a Ph.D. Degree or higher
2. Have an employment relationship with the institution founding your ethics committee (the committee does not have external and/or lay members)
3. Have the required professional background resulting from the field of the institution
4. Do not have a scientific degree in the field of the committee's activity but are experts in other areas
5. Have no scientific expertise (lay members)
6. Have no employment relationship with the institution founding your ethics committee (extramural members)
7. If it has not been possible to characterize the composition of your committee with the options in the previous question, please try to describe them here:

**Q5 / The Chairperson or Vice-Chairpersons of the committee shall serve in their respective capacities:**

1. Appointed by the founder
2. Elected by the members of the committee
3. Otherwise appointed – please specify:

**Q6 / Projects required to be reviewed by your committee include:**

1. Clinical trials
2. Biomedical research projects with human participants (other than clinical trials)
3. Research projects with biological material of human origin (other than commercially available material)
4. Projects with human participants in non-biomedical sciences using biomedical methods and/or technologies
5. Projects involving behavioral research
6. Social science research projects
7. Projects involving the collection of so-called sensitive personal data
8. Projects involving research using deception
9. Other projects – please specify:

**Q7 / The projects required to be reviewed by your committee include:**

1. Research projects involving minors
2. Projects involving patients of healthcare institutions
3. Projects involving people in clinical need
4. Research projects involving persons with limited capacity to consent
5. Research projects involving vulnerable populations (e.g., the elderly, pregnant women, and people from disadvantaged communities)
6. Research projects involving subordinate persons (e.g. Students, prisoners, soldiers)
7. Other projects – please specify

**Q8 / The projects required to be reviewed by your committee (other than clinical trials) include:**

1. Projects for which an ethics committee review is required by the international obligations (ETS 164, CETS 195)
2. Projects for which ethics review is required by the funder (e.g. Granting agency)
3. Projects for which an ethics review is required by the publisher
4. Other projects – please specify

**Q9 / Submitted projects are reviewed as follows:**

1. All members of the committee simultaneously read and comment on all submitted material
2. One or more of the designated members of the committee (rapporteurs) get to know the project in detail and report back to the others; the others have access to all the submitted material
3. One or more of the designated members of the committee (rapporteurs) get to know the project in detail and report back to the others; the others shall not have access to all the material submitted
4. Otherwise – please specify

**Q10 / As necessary documentation for the review of a research project (other than clinical trials), the committee requires:**

1. A preliminary project design
2. Full project documentation
3. A particular form (checklist) to identify ethically relevant aspects of the project
4. The text of the informed consent and/or instructions to respondents
5. A document demonstrating the collaboration with the healthcare institution (e.g., Letter of commitment, letter of intent, collaboration agreement, MTA...)
6. Other – please specify

**Q11 / When approving projects, your committee considers:**

1. The project's compliance with international ethical standards for the research – if yes, please specify which standards
2. Compliance of the project with the internal institutional standards
3. Compliance of the project with the legal requirements for the research area
4. The processing of personal data
5. Other – please specify

**Q12 / When reviewing research projects submitted to grant competitions, the project must be approved by your committee:**

1. Before submitting the project proposal to the grant call
2. During the evaluation period
3. In the period between the announcement of the results of the grant call and the signing of the project contract (the negotiation period)
4. By the date of the start of the project, according to the project documentation
5. Before the start of the actual experiments that have ethical relevance
6. Otherwise – please specify

**Q13 / Your committee decides when approving the research projects:**

1. By voting at a meeting of the committee, whereby a supermajority of the affirmative votes of the committee members present is required to approve the project
2. By voting at a meeting of the committee, whereby a supermajority of the affirmative votes of all committee members is required to approve the project
3. By per rollam voting, whereby a supermajority of the affirmative votes of all those voting is required for approval of the project
4. By per rollam voting, whereby a supermajority of the affirmative votes of all members of the committee is required for approval of the project
5. Otherwise – please specify

**Q14 / When your committee votes to approve research projects (please list all that apply):**

1. Is there a minimum quorum – what is it, please?
2. A committee member who has declared a conflict of interest does not vote and the quorum does not change
3. A committee member who has declared a conflict of interest does not vote and is not counted in the quorum
4. Members of the committee may abstain from voting
5. In the event of an equality of votes, the chairperson's vote shall prevail
6. The chair of the committee may decide to approve a research project without a vote (presidential decision) – please specify the conditions

**Q15 / What do you consider to be the biggest problems in the functioning of your ethics committee?**

**Q16 / If you have additional information about the functioning of your ethics committee that you consider important and that we have not asked in the previous questions, please provide it here**

**Q17 / What do you consider important for improving the functioning of ethics committees in Czechia?**

**Q18 / If you wish, please write down the name of your ethics committee**
